# Supplementary material
Source: PubMed Central journal article supplement (PMC7456225)
Supplement: jci-130-135754-s093.pdf [file jci-130-135754-s093.pdf]

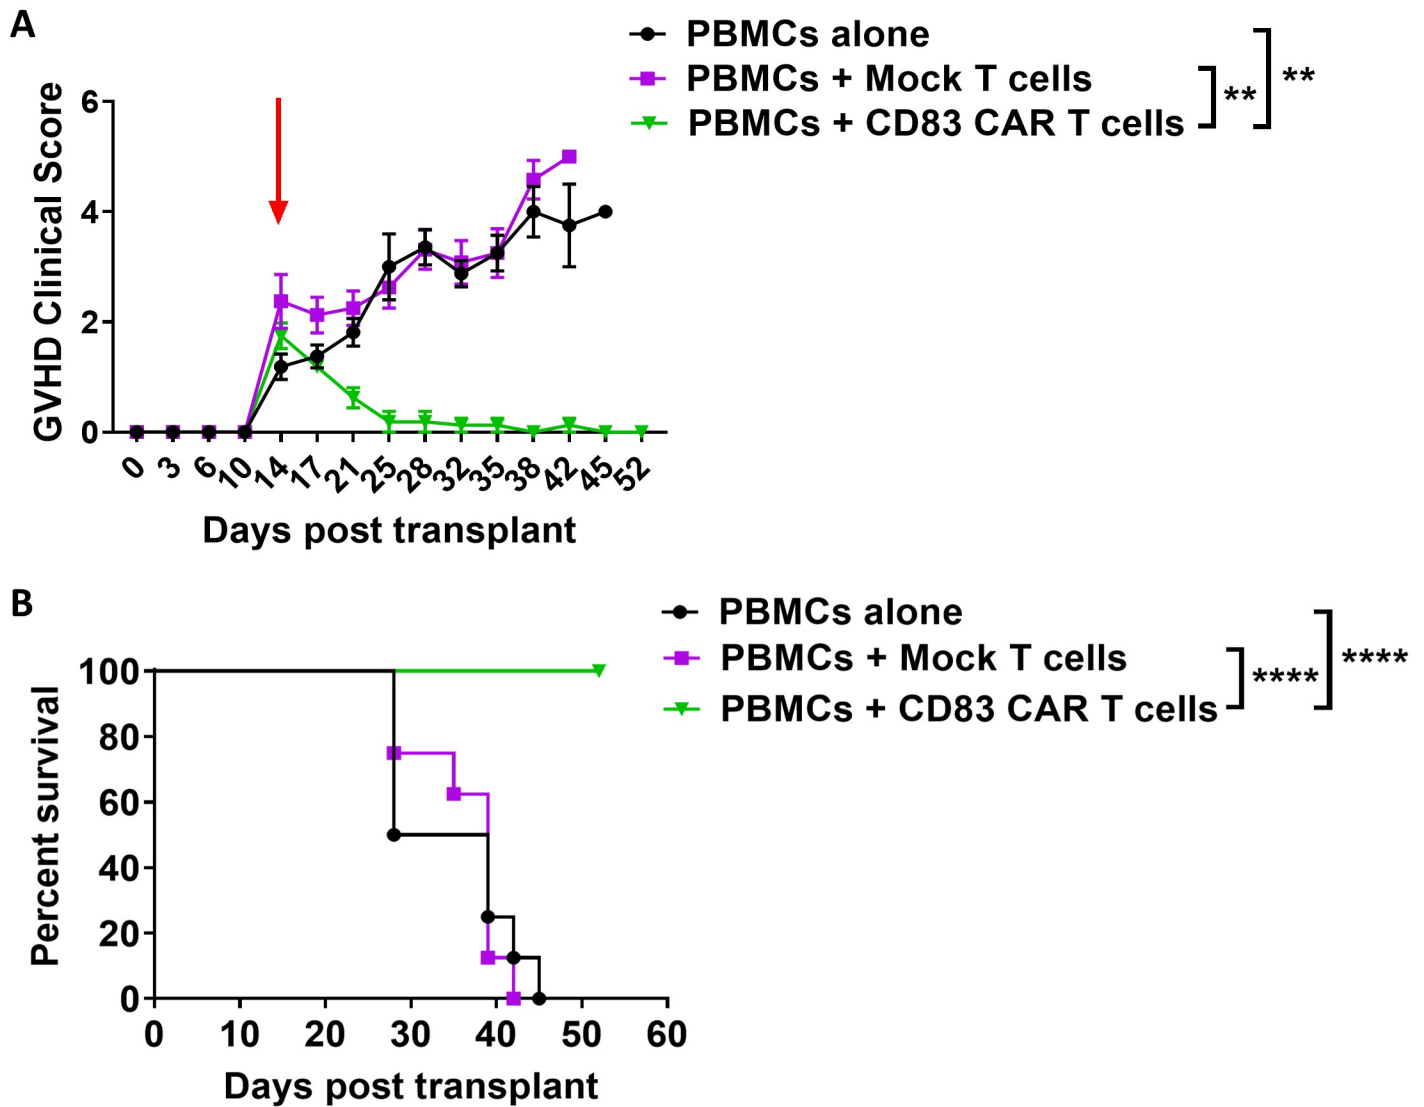

**Supplemental Figure 1: Human CD83 CAR T cells treat and rescue mice from xenogeneic GVHD.** NSG mice received  $25 \times 10^6$  human PBMCs on day 0, followed by  $1 \times 10^6$  autologous CD83 CAR T cells or mock transduced T cells on day +14. (A) GVHD clinical scores and (B) survival are shown. Red arrow shows when CD83 CAR or mock transduced T cells were administered. Pooled data from 2 independent experiments, 8 mice per experimental arm. ANOVA (A) or Log-rank test (B). \*\* $P = .001-.01$  and \*\*\*\* $P < .0001$ .

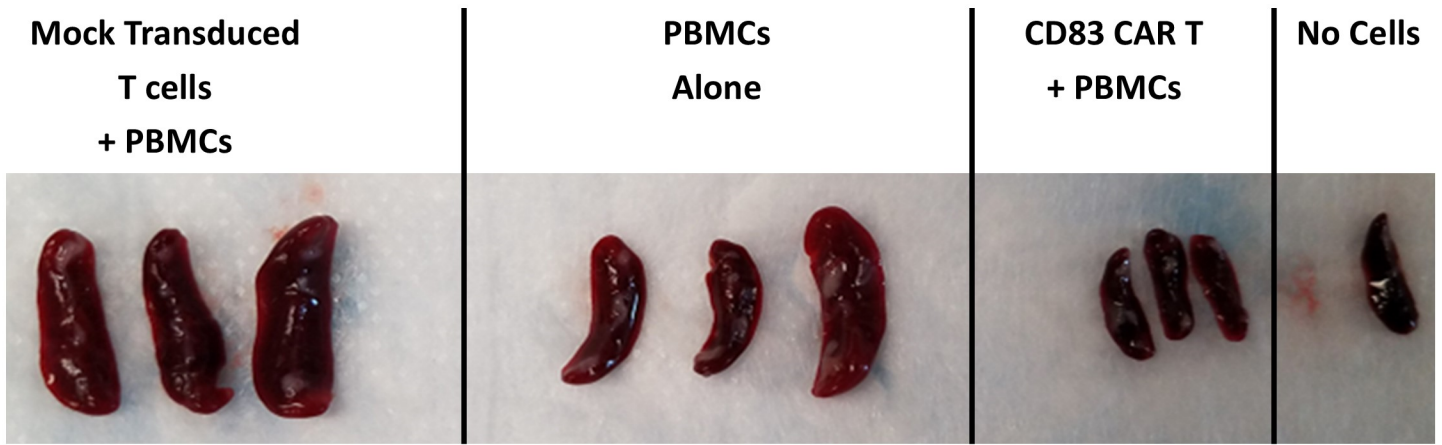

**Supplemental Figure 2: Human CD83 CAR T cells reduce the expansion of donor cells in vivo.** NSG mice were transplanted with  $25 \times 10^6$  human PBMCs plus  $1 \times 10^6$  CD83 CAR or mock transduced T cells. Control groups consisted of mice that received no PBMCs (negative control) and mice that received PBMCs without modified T cells (secondary positive control). Recipient mice were humanely euthanized at day +21 and their spleens were removed for gross assessment. A representative image shows mice that received PBMCs and CD83 CAR T cells exhibit reduced spleen size, supporting suppression of donor T cell expansion in vivo. 1 representative experiment of 2, up to 6 mice per experimental arm.

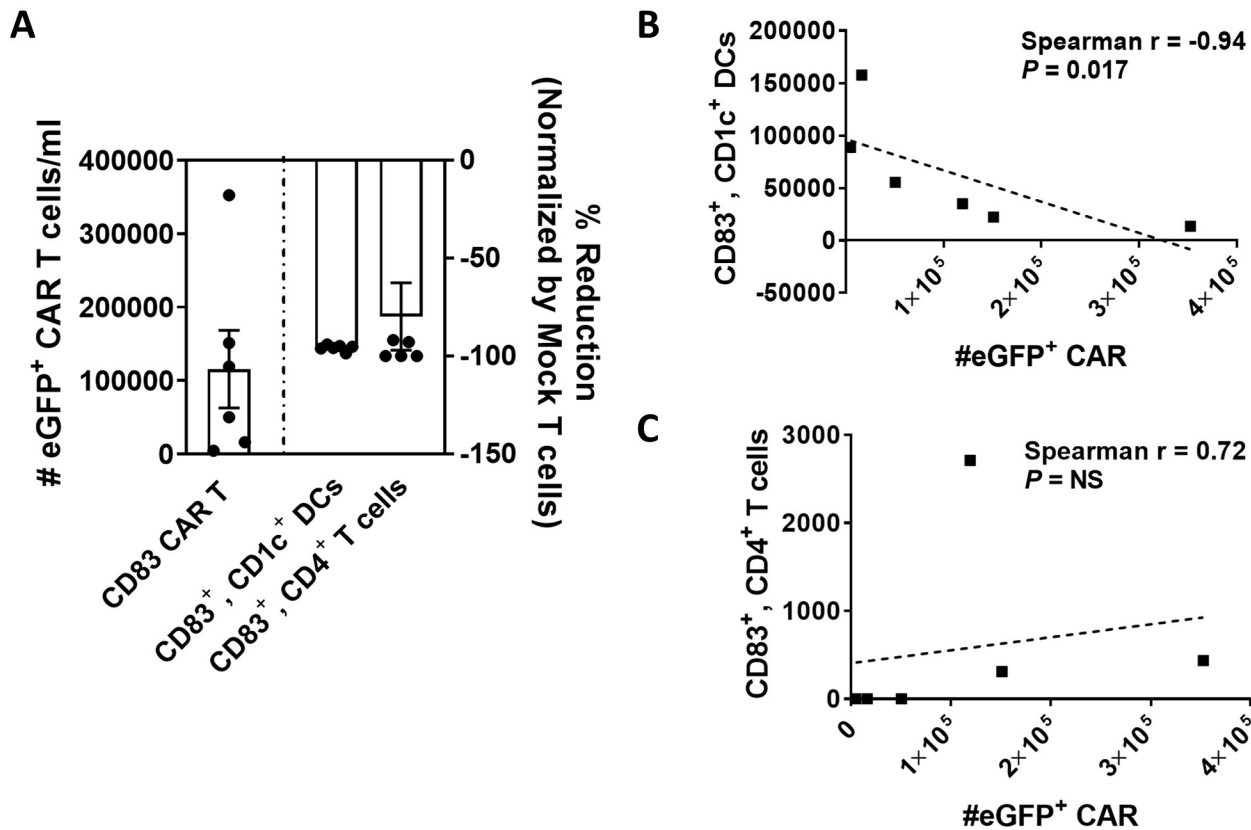

**Supplemental Figure 3: Human CD83 CAR T cells eliminate CD83<sup>+</sup> targets at day +21.** NSG mice were transplanted with 25x10<sup>6</sup> human PBMCs plus 1x10<sup>6</sup> CD83 CAR or mock transduced T cells. Recipient mice were humanely euthanized at day +21 and the amount of eGFP<sup>+</sup> CARs, CD83<sup>+</sup>, CD1c<sup>+</sup> DCs, and CD83<sup>+</sup>, CD4<sup>+</sup> T cells were analyzed by flow cytometry. A) Graph shows the amount of eGFP<sup>+</sup> CAR T cells in the recipient spleens at day +21, as well as the %reduction of CD83<sup>+</sup> targets in the spleen normalized by mice injected with mock T cells. B, C) Graphs show the linear regression (dotted line) of CD83<sup>+</sup> targets per the amount of eGFP<sup>+</sup> CAR T cells recovered at day +21. Spearman rank-order correlation coefficient is shown (B, C). Pooled data from 2 independent experiments, up to 6 mice per experimental arm.

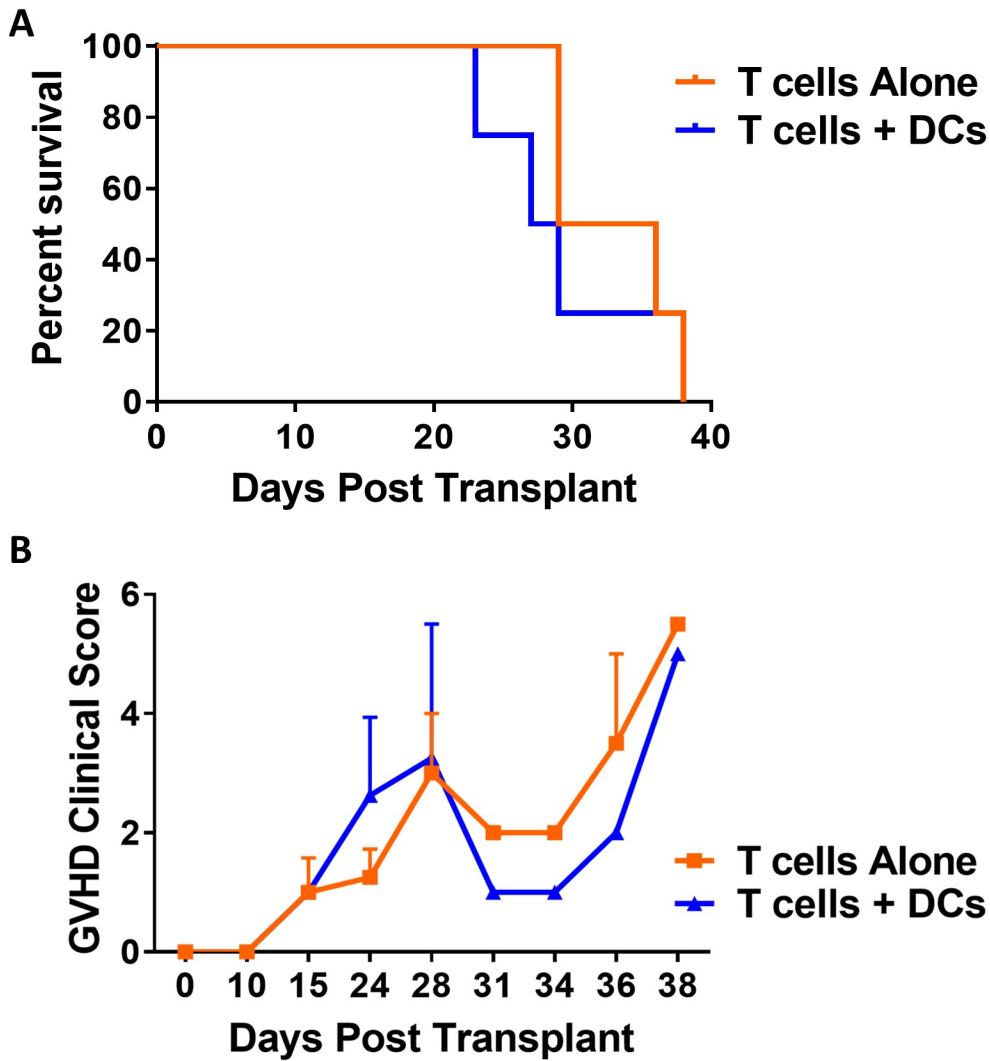

**Supplemental Figure 4: DC-depletion does not prevent xenogeneic GVHD mediated by human T cells.** NSG mice received  $7.5 \times 10^6$  purified human T cells alone or with  $1.87 \times 10^5$  autologous dendritic cells. The dendritic cells were isolated by magnetic bead purification (Miltenyi), and included plasmacytoid DCs,  $CD1c^+$  type-1 myeloid DCs, and  $CD1c^-$ ,  $CD141^{\text{bright}}$  type-2 myeloid DCs. (A) Survival and (B) GVHD clinical scores are shown. A representative experiment is shown, 4 mice per experimental arm.

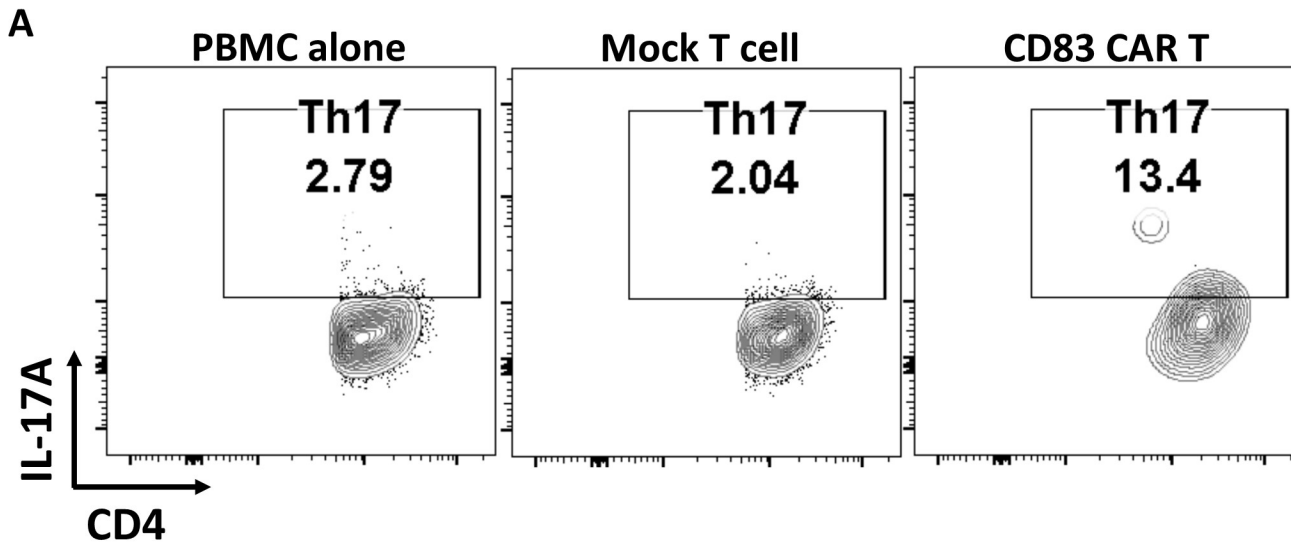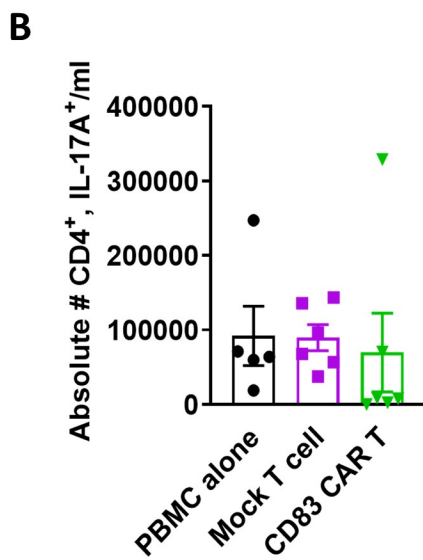

**Supplemental Figure 5: Human CD83 CAR T cells do not reduce the amount of donor Th17 cells.** NSG mice received  $25 \times 10^6$  human PBMCs plus  $1 \times 10^6$  CD83 CAR or mock transduced T cells as described. Mice were humanely euthanized on day +21 and the spleens were harvested. A) Representative contour plots show the frequency of human CD4<sup>+</sup>, IL-17<sup>+</sup> Th17 cells in the mouse spleens at day +21. B) Graph shows the absolute number (mean  $\pm$  SEM) of human Th17 cells in the mouse spleens at day +21. Pooled data from 2 independent experiments, up to 6 mice per experimental arm.

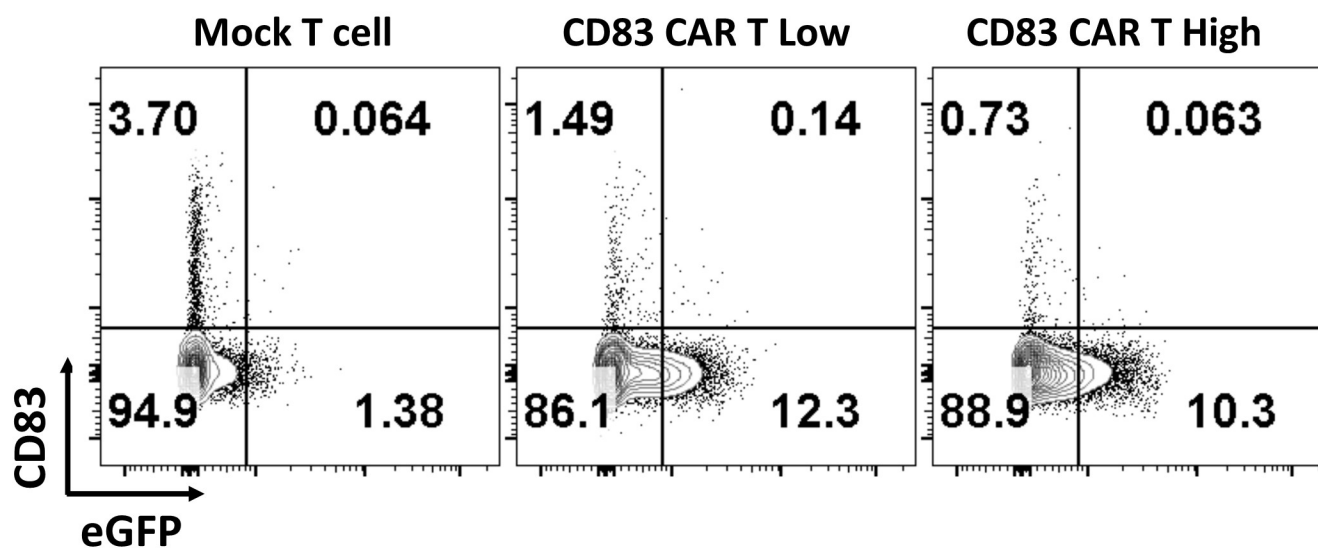

**Supplemental Figure 6: Human CD83 CAR T cells are present at day +100.** NSG mice received  $25 \times 10^6$  human PBMCs plus  $1-10 \times 10^6$  CD83 CAR or  $10 \times 10^6$  mock transduced T cells. The contour plots show the amount of CD83<sup>+</sup> target cells versus eGFP<sup>+</sup> CD83 CAR T cells from the spleens of representative mice that survived up to the day +100 endpoint. Data from 1 representative experiment of 3 is shown.

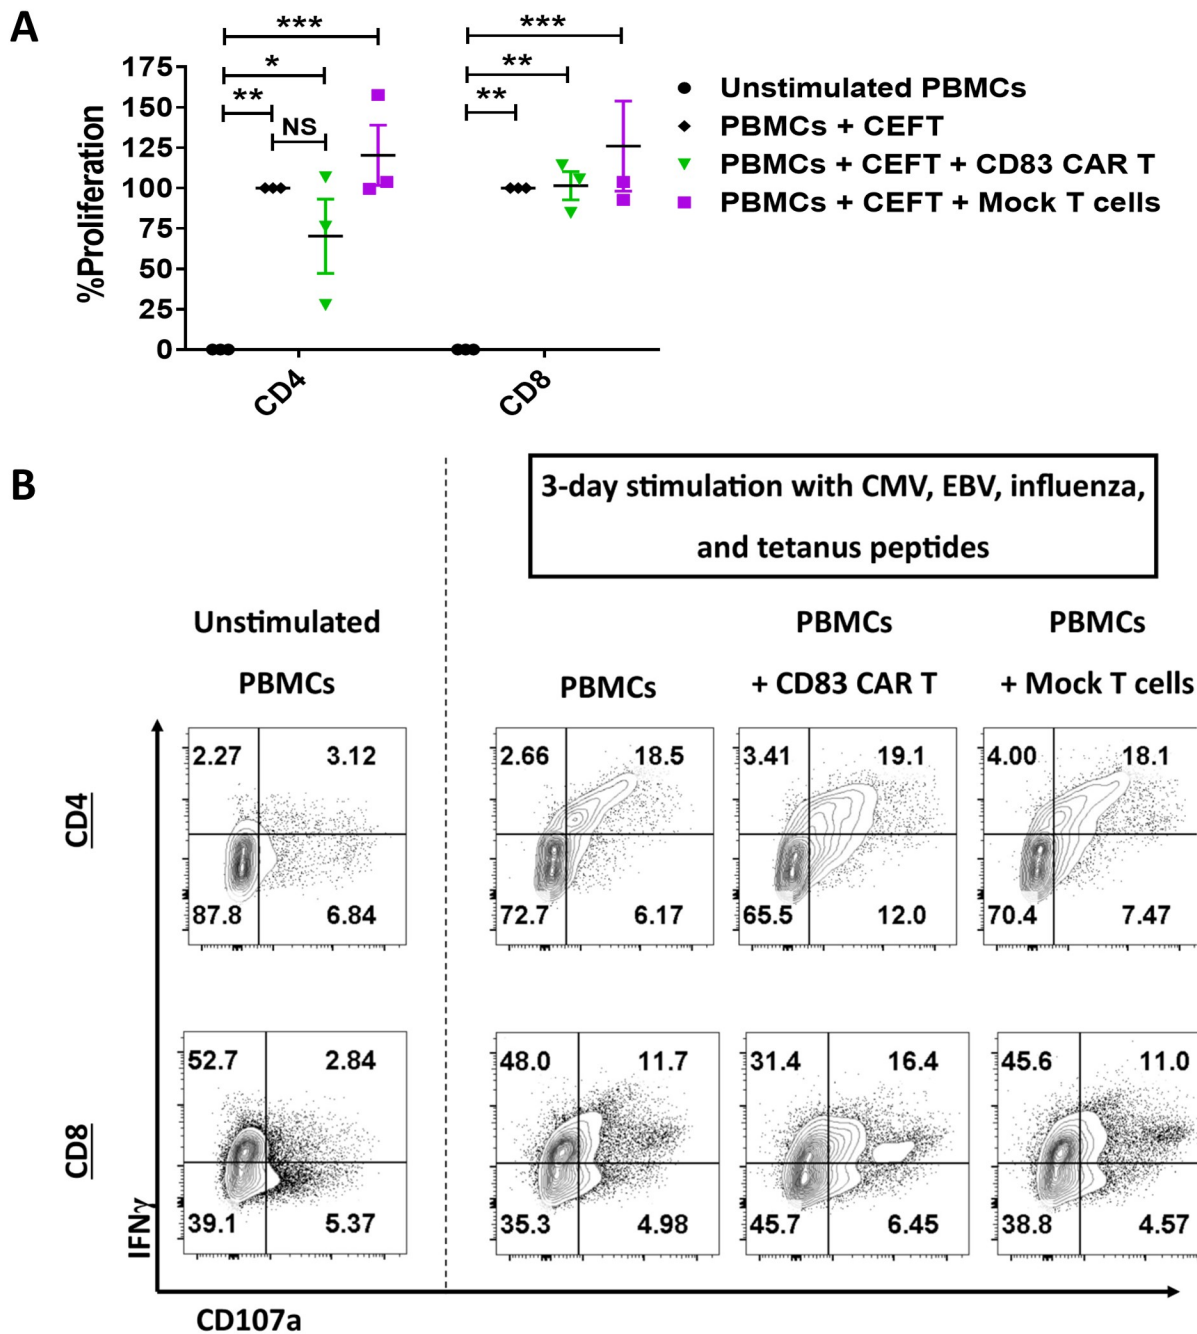

**Supplemental Figure 7: Human CD83 CAR T cells permit anti-viral immunity.** Human peripheral blood mononuclear cells (PBMCs) were stimulated with cytomegalovirus, Epstein-Barr virus, influenza, and tetanus (CEFT) peptide for 3 days, in the presence of CD83-targeted CAR or mock transduced T cells (T cell to CAR ratio ~10:1). A) Graph shows % proliferation  $\pm$  SEM of CEFT-stimulated CD4<sup>+</sup> and CD8<sup>+</sup> T cells after 3 days of culture with CD83 CAR or mock transduced T cells. n=3 independent experiments. B) Representative contour plots show the frequency of CD4<sup>+</sup> and CD8<sup>+</sup> T cells that produce IFN $\gamma$  and degranulate after CEFT stimulation in the presence of CD83 CAR or mock transduced T cells. 1 of 3 representative experiments is shown. ANOVA (A). \* $P$ <.05, \*\* $P$ =.001-.01, and \*\*\* $P$ =.0001-.001. NS = not significant.

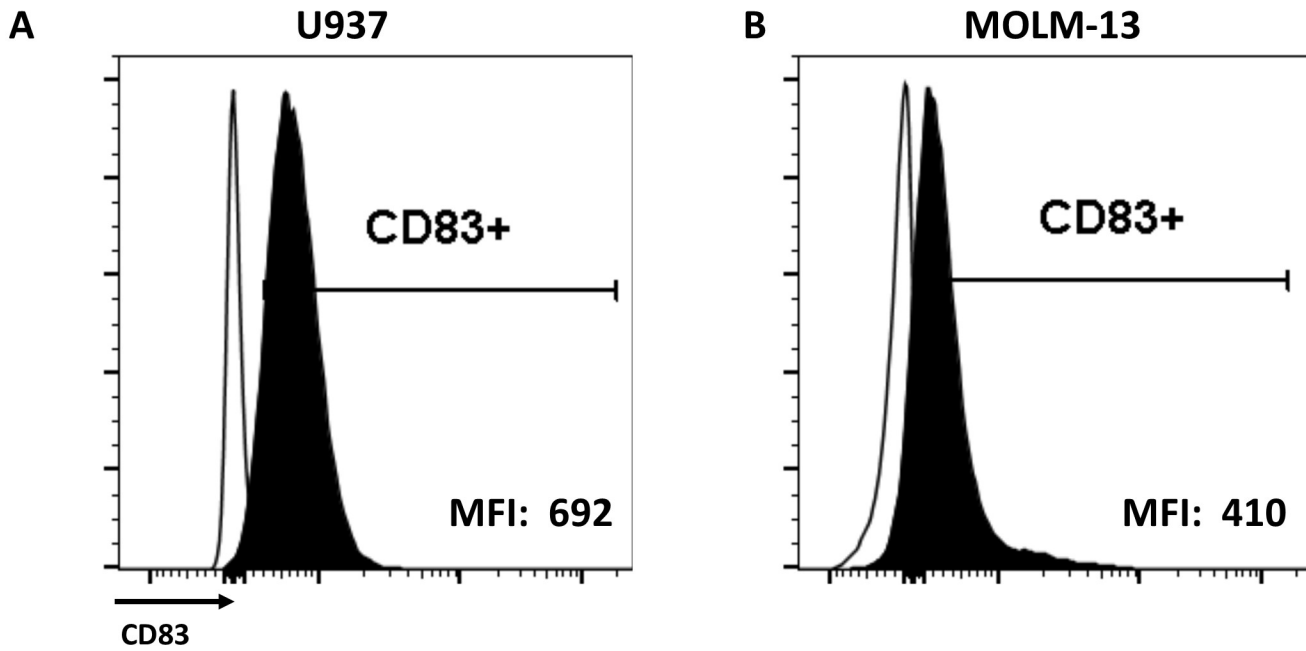

**Supplemental Figure 8: Expression of CD83 on U937 and MOLM-13 cells.** Histogram shows CD83 expression among proliferating A) U937 and B) MOLM-13 cells with MFI noted in the lower right-hand corner.



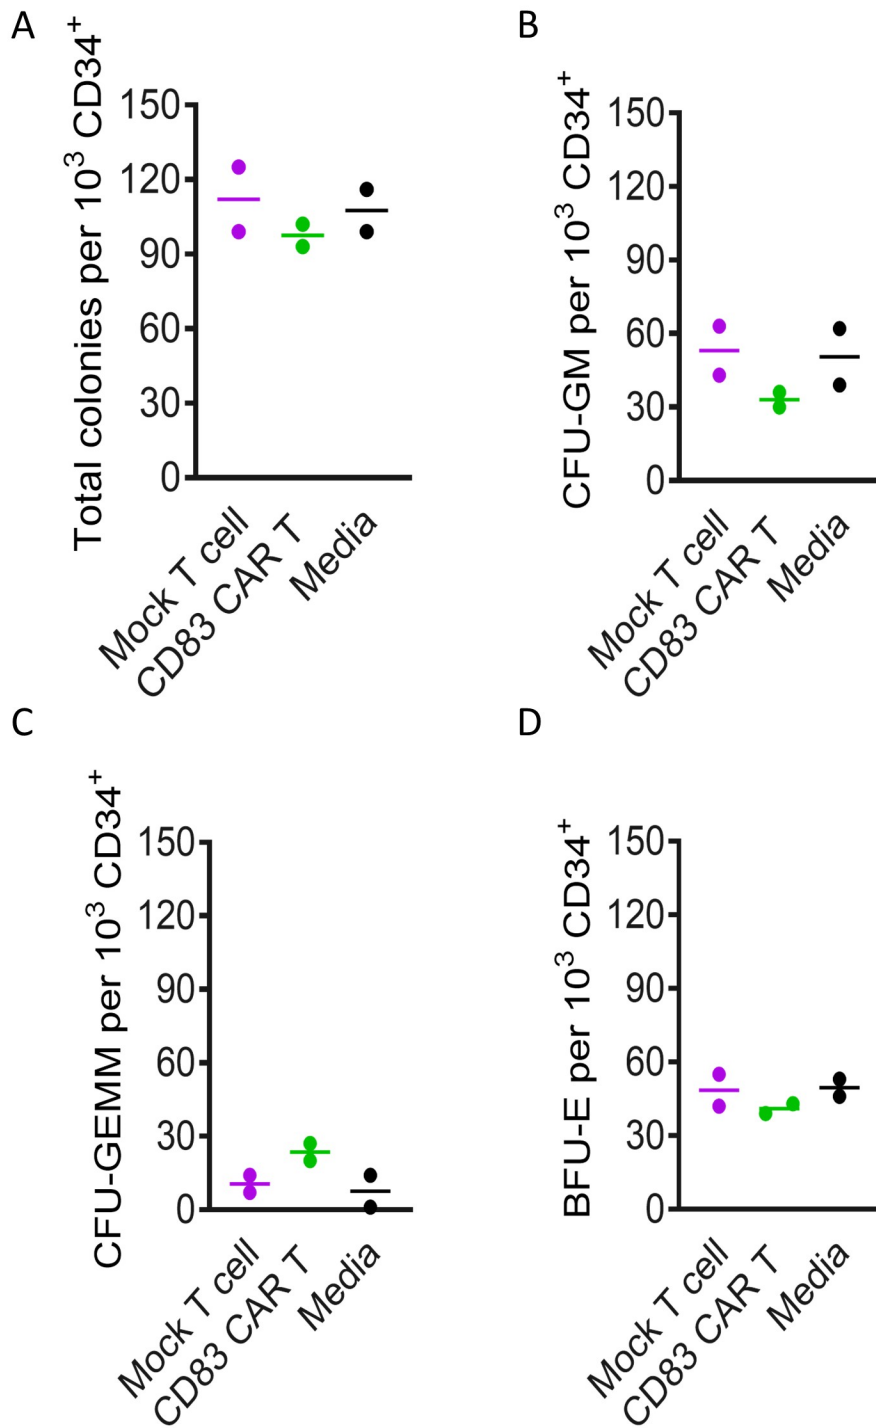

**Supplemental Figure 9: Impact of human CD83 CAR T cells on hematopoietic stem cells in vitro.**

CD34<sup>+</sup> cells isolated from normal human bone marrow were co-incubated with either CAR T cells, mock T cells, or media alone at a 10:1 effector-to-target ratio for 4 hours. Cells were plated in Methocult medium in duplicates and cultured for 14 days, followed by colony counts. Graphs show the amount of A) total colonies, B) colony forming units (CFU)-granulocyte/macrophage (GM), C) CFU-granulocyte/erythrocyte/monocyte/megakaryocyte (GEMM), and D) erythroid blast forming units (BFU). n=2 independent donors.

**A**HeatMap Data 18-630 CD83 TMA MT09 : Tumor Density: Pos Cell Count / Cell Area (Cells/mm<sup>2</sup>)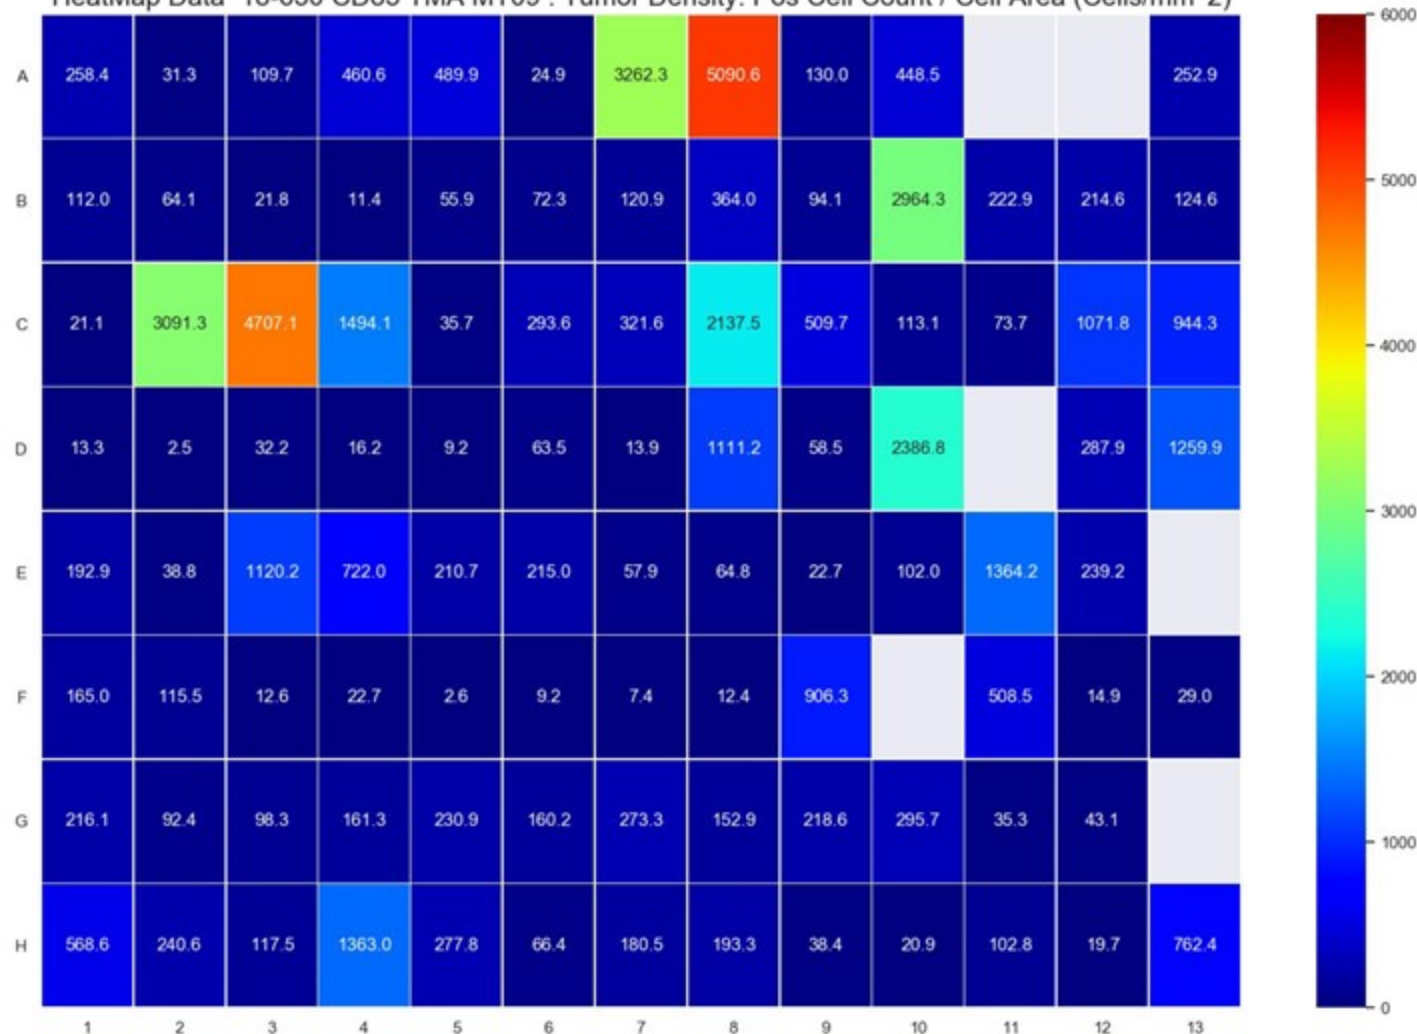**B**

|   | 1               | 2               | 3               | 4               | 5               | 6               | 7               | 8               | 9                       | 10                      | 11                  | 12                  | 13          |
|---|-----------------|-----------------|-----------------|-----------------|-----------------|-----------------|-----------------|-----------------|-------------------------|-------------------------|---------------------|---------------------|-------------|
| A | Adrenal Gland   | Adrenal Gland   | Adrenal Gland   | Bladder Urinary | Bladder urinary | Bladder Urinary | Bone marrow     | Bone marrow     | Head and neck, salivary | Head and neck, Salivary | Eye                 | Eye                 | Breast      |
| B | Breast          | Breast          | Cerebellum      | Cerebellum      | Cerebellum      | Cerebral cortex | Cerebral cortex | Cerebral cortex | Fallopian tube          | Fallopian tube          | Fallopian tube      | Esophagus           | Esophagus   |
| C | Esophagus       | Stomach         | Stomach         | Stomach         | Small Intestine | Small Intestine | Small Intestine | Colon           | Colon                   | Colon                   | Rectum              | Rectum              | Rectum      |
| D | Heart           | Heart           | Heart           | Kidney cortex   | Kidney cortex   | Kidney cortex   | Kidney medulla  | Kidney medulla  | Peripheral Nerve        | Peripheral Nerve        | Ureter              | Ureter              | Liver       |
| E | Liver           | Liver           | Lung            | Lung            | Lung            | Ovary           | Ovary           | Ovary           | Pancreas                | Pancreas                | Pancreas            | Parathyroid         | Parathyroid |
| F | Pituitary gland | Pituitary gland | Pituitary gland | Placenta        | Placenta        | Placenta        | Prostate        | Prostate        | Skin                    | Skin                    | Skin                | Spinal Cord         | Spinal Cord |
| G | Spleen          | Spleen          | Spleen          | Skeletal muscle | Skeletal muscle | Skeletal muscle | Testis          | Testis          | Testis                  | Thymus                  | Thymus              | Thymus              |             |
| H | Thyroid         | Thyroid         | Thyroid         | Tonsil          | Tonsil          | Tonsil          | Uterus, cervix  | Uterus, cervix  | Uterus, cervix          | Uterus, endometrium     | Uterus, endometrium | Uterus, endometrium |             |

**Supplemental Figure 10: Human CD83 Tissue Microarray.** CD83 protein expression was evaluated by quantitative immunohistochemistry on FFPE human TMA by Reveal Biosciences, Inc. CD83 was performed at 1:200 dilution. Heat-induced epitope retrieval was performed on a Leica Bond immunostainer with Leica Bond Epitope Retrieval buffer 1 (Citrate, pH 6.0) for 20 mins. Positive signal was visualized using DAB with a hematoxylin nuclear counterstain. A) Heat map of CD83 positive cells per mm<sup>2</sup> of tissue. B) Plate layout names of tissues in heatmap.

| <b>Supplemental Table 1: Key reagents</b> |               |                            |                        |                         |
|-------------------------------------------|---------------|----------------------------|------------------------|-------------------------|
| <b>Antibodies</b>                         |               |                            |                        |                         |
| <b>Antigen:</b>                           | <b>Fluor:</b> | <b>Manufacturer:</b>       | <b>Clone:</b>          | <b>Catalog #</b>        |
| <b>CD127</b>                              | <b>AF647</b>  | <b>BD<br/>Biosciences</b>  | <b>HIL-7R-<br/>M21</b> | <b>558598</b>           |
| <b>CD4</b>                                | <b>FITC</b>   | <b>ThermoFisher</b>        | <b>OKT4</b>            | <b>11-0048-42</b>       |
| <b>CD25</b>                               | <b>PECy7</b>  | <b>ThermoFisher</b>        | <b>M-A251</b>          | <b>557741</b>           |
| <b>Foxp3</b>                              | <b>PE</b>     | <b>BD<br/>Biosciences</b>  | <b>259D/C7</b>         | <b>560046</b>           |
| <b>Ki67</b>                               | <b>PE</b>     | <b>ThermoFisher</b>        | <b>20Raj1</b>          | <b>12-5699-42</b>       |
| <b>CD4</b>                                | <b>PECy7</b>  | <b>ThermoFisher</b>        | <b>SK3</b>             | <b>25-0047-42</b>       |
| <b>IL-4</b>                               | <b>APC</b>    | <b>ThermoFisher</b>        | <b>8D4-8</b>           | <b>17-7049-42</b>       |
| <b>IFN-<math>\gamma</math></b>            | <b>FITC</b>   | <b>BD<br/>Biosciences</b>  | <b>B27</b>             | <b>554700</b>           |
| <b>IL-17</b>                              | <b>BV421</b>  | <b>Biolegend</b>           | <b>BL168</b>           | <b>512322</b>           |
| <b>GATA3</b>                              | <b>BV421</b>  | <b>BD Horizon</b>          | <b>L50-823</b>         | <b>563349</b>           |
| <b>T-BET</b>                              | <b>PECy7</b>  | <b>Biolegend</b>           | <b>4B10</b>            | <b>644824</b>           |
| <b>ROR<math>\gamma</math>t</b>            | <b>BV650</b>  | <b>BD Horizon</b>          | <b>Q21-559</b>         | <b>563424</b>           |
| <b>CD3</b>                                | <b>FITC</b>   | <b>ThermoFisher</b>        | <b>OKT3</b>            | <b>11-0037-42</b>       |
| <b>CD4</b>                                | <b>PE</b>     | <b>ThermoFisher</b>        | <b>RPA-T4</b>          | <b>12-0049-42</b>       |
| <b>CD83</b>                               | <b>APC</b>    | <b>Miltenyi<br/>Biotec</b> | <b>REA714</b>          | <b>130-110-<br/>504</b> |

|                                                      |           |                                |              |                  |
|------------------------------------------------------|-----------|--------------------------------|--------------|------------------|
| <b>CD83</b>                                          | <b>PE</b> | <b>BD</b><br><b>Pharmlngen</b> | <b>HB15e</b> | <b>556855</b>    |
| <b>Chemicals, Peptides, and Recombinant Proteins</b> |           |                                |              |                  |
| <b>Live Dead Fixable Yellow Stain</b>                |           | <b>ThermoFisher</b>            |              | <b>L34959</b>    |
| <b>Live Dead Fixable Aqua Stain</b>                  |           | <b>ThermoFisher</b>            |              | <b>L34965</b>    |
| <b>Human recombinant IL-2</b>                        |           | <b>R&amp;D</b>                 |              | <b>202-IL/CF</b> |
